# Supplementary material for: PfAP2-EXP2, an Essential Transcription Factor for the Intraerythrocytic Development of Plasmodium falciparum
Source: Front Cell Dev Biol. 2022 Jan 10;9:782293. doi: 10.3389/fcell.2021.782293 (PMC8785209; doi:10.3389/fcell.2021.782293)
Supplement: Supplementary file 1 [file Table2.XLSX]

## Sheet: Table S2
Table S2. Target genes of PfAP2-EXP2 at the schizont stage
Gene ID	Gene Name	Chromsome	Gene Start	Gene Strand	Peak Position Relative to Transcription Start Site
PF3D7_0100600	RIF	Pf3D7_01_v3	55006	-	-1320 (5' UTR)
PF3D7_0101100	EPF4	Pf3D7_01_v3	70417	-	367 (Gene), 564 (Gene), 825 (Gene)
PF3D7_0101500	VAR	Pf3D7_01_v3	78241	+	1568 (Gene)
PF3D7_0105700	PF3D7_0105700	Pf3D7_01_v3	238666	+	2643 (Gene)
PF3D7_0112100	N.A.	Pf3D7_01_v3	454847	+	385 (Gene)
PF3D7_0113900	CBP1	Pf3D7_01_v3	538025	-	-559 (5' UTR)
PF3D7_0114200	EPF3	Pf3D7_01_v3	551713	-	783 (Gene)
PF3D7_0114700	RIF	Pf3D7_01_v3	564842	-	380 (Gene), 1045 (Gene)
PF3D7_0115000	SURF1.3	Pf3D7_01_v3	577704	+	3847 (Gene)
PF3D7_0115300	RIF	Pf3D7_01_v3	595102	+	373 (Gene)
PF3D7_0115700	VAR	Pf3D7_01_v3	614893	-	1166 (Gene)
PF3D7_0200100	VAR	Pf3D7_02_v3	25232	+	348 (Gene), 1160 (Gene)
PF3D7_0200700	RIF	Pf3D7_02_v3	50147	-	380 (Gene), 1202 (Gene)
PF3D7_0200800	N.A.	Pf3D7_02_v3	53055	-	157 (Gene)
PF3D7_0212600	SPATR	Pf3D7_02_v3	522931	+	143 (Gene)
PF3D7_0220900	N.A.	Pf3D7_02_v3	846375	-	405 (Gene)
PF3D7_0222300	N.A.	Pf3D7_02_v3	883452	+	114 (Gene), 789 (Gene)
PF3D7_0222500	RIF	Pf3D7_02_v3	889660	+	-1340 (5' UTR)
PF3D7_0222700	RIF	Pf3D7_02_v3	896226	+	-1446 (5' UTR), 920 (Gene)
PF3D7_0223300	N.A.	Pf3D7_02_v3	909350	+	1298 (Gene)
PF3D7_0223400	RIF	Pf3D7_02_v3	913244	+	425 (Gene)
PF3D7_0300200	RIF	Pf3D7_03_v3	47579	-	-423 (5' UTR)
PF3D7_0301600	GEXP21	Pf3D7_03_v3	93463	-	496 (Gene)
PF3D7_0316500	NUF2	Pf3D7_03_v3	667006	+	80 (Gene)
PF3D7_0319300	PF3D7_0319300	Pf3D7_03_v3	807277	+	414 (Gene)
PF3D7_0319500	PF3D7_0319500	Pf3D7_03_v3	815569	+	902 (Gene)
PF3D7_0324000	EPF1	Pf3D7_03_v3	1005952	+	576 (Gene)
PF3D7_0324200	EPF3	Pf3D7_03_v3	1011140	-	226 (Gene), 492 (Gene)
PF3D7_0324400	RIF	Pf3D7_03_v3	1015795	+	287 (Gene)
PF3D7_0324500	N.A.	Pf3D7_03_v3	1018874	+	-1308 (5' UTR), 755 (Gene)
PF3D7_0324600	PF3D7_0324600	Pf3D7_03_v3	1021998	+	933 (Gene)
PF3D7_0324700	N.A.	Pf3D7_03_v3	1024030	+	1014 (Gene)
PF3D7_0324900	VAR	Pf3D7_03_v3	1038254	-	-2501 (5' UTR), 1905 (Gene), 5150 (Gene)
PF3D7_0400400	VAR	Pf3D7_04_v3	56860	-	1489 (Gene), 4672 (Gene), 7908 (Gene)
PF3D7_0400500	RIF	Pf3D7_04_v3	59636	+	276 (Gene)
PF3D7_0400900	RIF	Pf3D7_04_v3	71113	-	325 (Gene)
PF3D7_0401200	RIF	Pf3D7_04_v3	79193	+	1131 (Gene)
PF3D7_0402500	N.A.	Pf3D7_04_v3	155877	+	935 (Gene)
PF3D7_0402600	PF3D7_0402600	Pf3D7_04_v3	160314	-	315 (Gene)
PF3D7_0402700	N.A.	Pf3D7_04_v3	163724	-	-1849 (5' UTR)
PF3D7_0402800	PF3D7_0402800	Pf3D7_04_v3	167449	+	-1876 (5' UTR)
PF3D7_0406800	PF3D7_0406800	Pf3D7_04_v3	352983	-	75 (Gene)
PF3D7_0407600	PF3D7_0407600	Pf3D7_04_v3	373039	+	1928 (Gene)
PF3D7_0412400	VAR	Pf3D7_04_v3	553810	-	-2185 (5' UTR)
PF3D7_0412500	N.A.	Pf3D7_04_v3	557456	+	-1461 (5' UTR)
PF3D7_0412600	N.A.	Pf3D7_04_v3	560638	-	1145 (Gene)
PF3D7_0412900	VAR	Pf3D7_04_v3	584668	-	7835 (Gene)
PF3D7_0413000	N.A.	Pf3D7_04_v3	588424	+	103 (Gene)
PF3D7_0413100	VAR	Pf3D7_04_v3	599849	-	-2276 (5' UTR), 590 (Gene), 2090 (Gene)
PF3D7_0420700	VAR	Pf3D7_04_v3	941875	-	-239 (5' UTR)
PF3D7_0420800	N.A.	Pf3D7_04_v3	944951	+	-2837 (5' UTR), 80 (Gene)
PF3D7_0421000	N.A.	Pf3D7_04_v3	956849	+	76 (Gene)
PF3D7_0421200	RIF	Pf3D7_04_v3	967087	+	802 (Gene)
PF3D7_0422200	N.A.	Pf3D7_04_v3	1017247	-	1750 (Gene)
PF3D7_0426000	VAR	Pf3D7_04_v3	1180226	-	908 (Gene)
PF3D7_0500500	RIF	Pf3D7_05_v3	37564	-	-1357 (5' UTR)
PF3D7_0501300	SBP1	Pf3D7_05_v3	68930	+	1004 (Gene)
PF3D7_0505000	N.A.	Pf3D7_05_v3	218189	-	1992 (Gene)
PF3D7_0507200	SUB3	Pf3D7_05_v3	300736	-	-382 (5' UTR)
PF3D7_0510100	PF3D7_0510100	Pf3D7_05_v3	430353	-	53 (Gene)
PF3D7_0528900	N.A.	Pf3D7_05_v3	1185639	-	801 (Gene)
PF3D7_0531800	N.A.	Pf3D7_05_v3	1292052	+	108 (Gene)
PF3D7_0532200	PF3D7_0532200	Pf3D7_05_v3	1304526	-	749 (Gene)
PF3D7_0533100	VAR1CSA	Pf3D7_05_v3	1333470	+	5535 (Gene), 7250 (Gene)
PF3D7_0600300	RIF	Pf3D7_06_v3	16410	-	432 (Gene)
PF3D7_0601000	EPF4	Pf3D7_06_v3	43218	-	866 (Gene)
PF3D7_0601300	EPF1	Pf3D7_06_v3	49722	-	-619 (5' UTR)
PF3D7_0601400	VAR	Pf3D7_06_v3	51351	+	-1010 (5' UTR), 28 (Gene)
PF3D7_0619000	PF3D7_0619000	Pf3D7_06_v3	796025	-	4743 (Gene)
PF3D7_0620200	PF3D7_0620200	Pf3D7_06_v3	847494	-	-548 (5' UTR)
PF3D7_0627900	POP4	Pf3D7_06_v3	1119587	+	207 (Gene)
PF3D7_0631800	RIF	Pf3D7_06_v3	1329771	+	-1282 (5' UTR), 264 (Gene)
PF3D7_0631900	PF3D7_0631900	Pf3D7_06_v3	1333013	+	330 (Gene)
PF3D7_0632100	RIF	Pf3D7_06_v3	1339417	-	-1287 (5' UTR)
PF3D7_0632200	RIF	Pf3D7_06_v3	1342595	-	-427 (5' UTR)
PF3D7_0632300	RIF	Pf3D7_06_v3	1347341	+	-1619 (5' UTR), -1332 (5' UTR)
PF3D7_0632400	RIF	Pf3D7_06_v3	1350724	+	472 (Gene)
PF3D7_0632500	VAR	Pf3D7_06_v3	1366430	-	1023 (Gene)
PF3D7_0632700	RIF	Pf3D7_06_v3	1371501	+	-266 (5' UTR)
PF3D7_0632800	VAR	Pf3D7_06_v3	1382627	-	-2291 (5' UTR)
PF3D7_0700100	VAR	Pf3D7_07_v3	20307	+	3606 (Gene), 5229 (Gene), 7492 (Gene)
PF3D7_0700300	RIF	Pf3D7_07_v3	34804	-	1229 (3' UTR)
PF3D7_0700500	RIF	Pf3D7_07_v3	41453	-	-436 (5' UTR)
PF3D7_0700700	N.A.	Pf3D7_07_v3	45559	+	342 (Gene), 904 (Gene)
PF3D7_0701100	RIF	Pf3D7_07_v3	56781	-	382 (Gene)
PF3D7_0701400	N.A.	Pf3D7_07_v3	66854	-	675 (Gene)
PF3D7_0701500	EPF3	Pf3D7_07_v3	68066	+	287 (Gene), 641 (Gene)
PF3D7_0704500	PF3D7_0704500	Pf3D7_07_v3	213501	-	581 (Gene)
PF3D7_0705200	N.A.	Pf3D7_07_v3	256086	+	2198 (Gene)
PF3D7_0711900	N.A.	Pf3D7_07_v3	526320	-	663 (Gene)
PF3D7_0712600	VAR	Pf3D7_07_v3	574308	-	6771 (Gene)
PF3D7_0712900	VAR	Pf3D7_07_v3	597733	-	-17 (5' UTR)
PF3D7_0713100	MC-2TM	Pf3D7_07_v3	605653	+	265 (Gene)
PF3D7_0719700	RPS10	Pf3D7_07_v3	861583	+	872 (Gene)
PF3D7_0727000	VPS53	Pf3D7_07_v3	1151058	-	3190 (Gene)
PF3D7_0732900	RIF	Pf3D7_07_v3	1414434	+	412 (Gene)
PF3D7_0800200	VAR	Pf3D7_08_v3	39033	-	5843 (Gene)
PF3D7_0800400	RIF	Pf3D7_08_v3	53982	-	-350 (5' UTR)
PF3D7_0800500	RIF	Pf3D7_08_v3	57703	-	-2046 (5' UTR), 385 (Gene)
PF3D7_0801900	LSD2	Pf3D7_08_v3	128849	+	13998 (3' UTR)
PF3D7_0808700	VAR	Pf3D7_08_v3	440408	+	-26 (5' UTR)
PF3D7_0812100	PF3D7_0812100	Pf3D7_08_v3	604923	+	7811 (Gene)
PF3D7_0819600	PF3D7_0819600	Pf3D7_08_v3	886136	-	993 (3' UTR)
PF3D7_0824800	PF3D7_0824800	Pf3D7_08_v3	1075800	+	2205 (Gene)
PF3D7_0829000	PF3D7_0829000	Pf3D7_08_v3	1245211	+	5235 (Gene)
PF3D7_0832000	PF3D7_0832000	Pf3D7_08_v3	1384377	-	478 (Gene)
PF3D7_0832250	N.A.	Pf3D7_08_v3	1394403	+	243 (Gene)
PF3D7_0832700	N.A.	Pf3D7_08_v3	1408571	+	128 (Gene)
PF3D7_0832800	N.A.	Pf3D7_08_v3	1411058	+	307 (Gene)
PF3D7_0833100	RIF	Pf3D7_08_v3	1422077	-	-480 (5' UTR)
PF3D7_0833200	N.A.	Pf3D7_08_v3	1426884	+	425 (Gene)
PF3D7_0833400	RIF	Pf3D7_08_v3	1432696	+	-417 (5' UTR)
PF3D7_0833500	VAR	Pf3D7_08_v3	1443449	-	7304 (Gene)
PF3D7_0900300	N.A.	Pf3D7_09_v3	34795	-	356 (Gene)
PF3D7_0900400	RIF	Pf3D7_09_v3	39554	+	1044 (Gene)
PF3D7_0900900	PF3D7_0900900	Pf3D7_09_v3	56081	-	937 (Gene)
PF3D7_0901100	RIF	Pf3D7_09_v3	62553	-	-2826 (5' UTR), -1328 (5' UTR), 342 (Gene)
PF3D7_0901200	N.A.	Pf3D7_09_v3	64428	-	-951 (5' UTR), 185 (Gene)
PF3D7_0901300	RIF	Pf3D7_09_v3	67334	+	-1955 (5' UTR), 388 (Gene)
PF3D7_0903100	RER1	Pf3D7_09_v3	130937	-	180 (Gene)
PF3D7_0912600	N.A.	Pf3D7_09_v3	559144	+	171 (Gene)
PF3D7_0919300	TrxL1	Pf3D7_09_v3	793217	+	649 (Gene)
PF3D7_0934300	PF3D7_0934300	Pf3D7_09_v3	1348022	+	311 (Gene)
PF3D7_0934600	PF3D7_0934600	Pf3D7_09_v3	1354581	+	725 (Gene)
PF3D7_0936600	GEXP5	Pf3D7_09_v3	1446929	+	767 (Gene)
PF3D7_0937600	VAR	Pf3D7_09_v3	1486070	+	965 (Gene)
PF3D7_0937700	RIF	Pf3D7_09_v3	1492373	+	395 (Gene)
PF3D7_0937800	VAR	Pf3D7_09_v3	1503336	-	306 (Gene), 1124 (Gene)
PF3D7_1014800	PF3D7_1014800	Pf3D7_10_v3	600413	-	1263 (Gene)
PF3D7_1035700	DBLMSP	Pf3D7_10_v3	1413200	+	-2159 (5' UTR)
PF3D7_1039400	PF3D7_1039400	Pf3D7_10_v3	1588498	-	508 (Gene)
PF3D7_1039700	MC-2TM	Pf3D7_10_v3	1592367	-	406 (Gene)
PF3D7_1040100	RIF	Pf3D7_10_v3	1602935	+	-1259 (5' UTR), 373 (Gene)
PF3D7_1040200	PF3D7_1040200	Pf3D7_10_v3	1605930	+	271 (Gene)
PF3D7_1040500	RIF	Pf3D7_10_v3	1615804	+	723 (Gene), 1007 (Gene)
PF3D7_1041000	RIF	Pf3D7_10_v3	1632398	+	360 (Gene)
PF3D7_1041100	RIF	Pf3D7_10_v3	1635596	+	-1344 (5' UTR), 632 (Gene)
PF3D7_1041200	RIF	Pf3D7_10_v3	1639171	+	423 (Gene)
PF3D7_1041300	VAR	Pf3D7_10_v3	1649948	-	-2672 (5' UTR), -1233 (5' UTR), 7183 (Gene)
PF3D7_1100100	VAR	Pf3D7_11_v3	24160	+	-1971 (5' UTR)
PF3D7_1100200	VAR	Pf3D7_11_v3	42386	-	5599 (Gene)
PF3D7_1100800	MC-2TM	Pf3D7_11_v3	59550	+	373 (Gene)
PF3D7_1101300	RIF	Pf3D7_11_v3	74442	-	352 (Gene)
PF3D7_1101500	EPF4	Pf3D7_11_v3	81424	-	826 (Gene)
PF3D7_1101700	MC-2TM	Pf3D7_11_v3	85629	+	316 (Gene), 433 (Gene)
PF3D7_1102100	N.A.	Pf3D7_11_v3	104300	+	-1079 (5' UTR)
PF3D7_1102200	PF3D7_1102200	Pf3D7_11_v3	107235	-	1732 (Gene)
PF3D7_1103600	N.A.	Pf3D7_11_v3	156614	+	137 (Gene)
PF3D7_1105500	CEN4	Pf3D7_11_v3	239687	+	833 (Gene)
PF3D7_1126500	PF3D7_1126500	Pf3D7_11_v3	1033062	+	3312 (Gene)
PF3D7_1137300	PF3D7_1137300	Pf3D7_11_v3	1468266	-	168 (Gene)
PF3D7_1137400	N.A.	Pf3D7_11_v3	1471877	-	210 (Gene)
PF3D7_1140800	PF3D7_1140800	Pf3D7_11_v3	1633920	+	959 (Gene)
PF3D7_1142100	PF3D7_1142100	Pf3D7_11_v3	1690084	-	2850 (Gene)
PF3D7_1142400	CPO	Pf3D7_11_v3	1703642	-	1479 (Gene)
PF3D7_1143600	N.A.	Pf3D7_11_v3	1741828	-	724 (Gene)
PF3D7_1146600	ORP1	Pf3D7_11_v3	1834401	+	2136 (Gene), 2341 (Gene)
PF3D7_1146700	PF3D7_1146700	Pf3D7_11_v3	1842878	-	135 (Gene)
PF3D7_1146800	PF3D7_1146800	Pf3D7_11_v3	1853372	-	5261 (Gene)
PF3D7_1150000	RIF	Pf3D7_11_v3	2012989	+	1159 (Gene)
PF3D7_1150400	VAR	Pf3D7_11_v3	2025817	+	4643 (Gene)
PF3D7_1200100	VAR	Pf3D7_12_v3	16973	+	1282 (Gene)
PF3D7_1200300	RIF	Pf3D7_12_v3	31261	-	-555 (5' UTR)
PF3D7_1200400	VAR	Pf3D7_12_v3	32703	+	-887 (5' UTR)
PF3D7_1211000	PF3D7_1211000	Pf3D7_12_v3	484065	+	-958 (5' UTR), -747 (5' UTR)
PF3D7_1211900	ATP4	Pf3D7_12_v3	532799	-	193 (Gene)
PF3D7_1219300	VAR	Pf3D7_12_v3	774197	-	24 (Gene), 310 (Gene)
PF3D7_1219600	ATPase2	Pf3D7_12_v3	790673	-	2404 (Gene)
PF3D7_1226800	ATX3	Pf3D7_12_v3	1085387	+	255 (Gene)
PF3D7_1240500	N.A.	Pf3D7_12_v3	1715981	-	98 (Gene)
PF3D7_1240600	VAR	Pf3D7_12_v3	1719574	+	7074 (Gene), 7806 (Gene)
PF3D7_1240700	N.A.	Pf3D7_12_v3	1728774	+	-428 (5' UTR), 382 (Gene)
PF3D7_1245200	PF3D7_1245200	Pf3D7_12_v3	1892698	-	1541 (Gene)
PF3D7_1253400	ACS3	Pf3D7_12_v3	2180419	+	2344 (Gene)
PF3D7_1253800	PF3D7_1253800	Pf3D7_12_v3	2196157	+	776 (Gene)
PF3D7_1253900	N.A.	Pf3D7_12_v3	2198926	+	722 (Gene)
PF3D7_1254000	RIF	Pf3D7_12_v3	2201495	+	450 (Gene), 647 (Gene)
PF3D7_1254200	RIF	Pf3D7_12_v3	2207830	+	516 (Gene), 1176 (Gene)
PF3D7_1254400	RIF	Pf3D7_12_v3	2214671	+	1220 (Gene)
PF3D7_1254600	PF3D7_1254600	Pf3D7_12_v3	2221835	+	307 (Gene)
PF3D7_1300100	VAR	Pf3D7_13_v3	21364	+	1230 (Gene)
PF3D7_1300200	RIF	Pf3D7_13_v3	31881	-	-340 (5' UTR)
PF3D7_1300300	VAR	Pf3D7_13_v3	44742	-	97 (Gene), 1021 (Gene), 5036 (Gene), 5926 (Gene)
PF3D7_1300500	RIF	Pf3D7_13_v3	50662	+	-1248 (5' UTR), 1016 (Gene)
PF3D7_1300700	RIF	Pf3D7_13_v3	58422	-	379 (Gene)
PF3D7_1300900	PF3D7_1300900	Pf3D7_13_v3	63547	-	949 (Gene)
PF3D7_1301000	N.A.	Pf3D7_13_v3	66816	-	344 (Gene), 882 (Gene)
PF3D7_1301100	N.A.	Pf3D7_13_v3	69411	-	277 (Gene)
PF3D7_1301200	GBPH2	Pf3D7_13_v3	74413	-	69 (Gene)
PF3D7_1304000	PF3D7_1304000	Pf3D7_13_v3	220029	-	2922 (Gene)
PF3D7_1305100	AMR3	Pf3D7_13_v3	253788	-	1186 (Gene)
PF3D7_1306200	PF3D7_1306200	Pf3D7_13_v3	291000	-	1391 (Gene)
PF3D7_1307400	N.A.	Pf3D7_13_v3	337263	-	1196 (Gene)
PF3D7_1323200	PF3D7_1323200	Pf3D7_13_v3	968798	-	535 (Gene)
PF3D7_1328200	PF3D7_1328200	Pf3D7_13_v3	1186619	+	8514 (Gene)
PF3D7_1352300	N.A.	Pf3D7_13_v3	2085530	-	538 (Gene)
PF3D7_1353900	PF3D7_1353900	Pf3D7_13_v3	2154162	+	126 (Gene)
PF3D7_1359100	PF3D7_1359100	Pf3D7_13_v3	2349986	-	1821 (Gene)
PF3D7_1360500	GCbeta	Pf3D7_13_v3	2413324	+	1587 (Gene)
PF3D7_1361200	N.A.	Pf3D7_13_v3	2455261	+	773 (Gene)
PF3D7_1362700	N.A.	Pf3D7_13_v3	2510355	+	521 (Gene)
PF3D7_1363000	PF3D7_1363000	Pf3D7_13_v3	2532201	+	2431 (Gene)
PF3D7_1369200	N.A.	Pf3D7_13_v3	2749595	+	6101 (Gene)
PF3D7_1369400	PF3D7_1369400	Pf3D7_13_v3	2759756	+	1181 (Gene)
PF3D7_1373100	RIF	Pf3D7_13_v3	2873088	-	-488 (5' UTR)
PF3D7_1373200	N.A.	Pf3D7_13_v3	2875991	+	-2415 (5' UTR)
PF3D7_1400100	N.A.	Pf3D7_14_v3	1393	+	-131 (5' UTR)
PF3D7_1400300	RIF	Pf3D7_14_v3	12117	-	-1306 (5' UTR)
PF3D7_1402800	PF3D7_1402800	Pf3D7_14_v3	100847	+	135 (Gene)
PF3D7_1402900	PF3D7_1402900	Pf3D7_14_v3	106370	+	218 (Gene)
PF3D7_1406100	N.A.	Pf3D7_14_v3	215651	-	1055 (Gene)
PF3D7_1423300	PP7	Pf3D7_14_v3	936168	+	1133 (Gene)
PF3D7_1427900	PF3D7_1427900	Pf3D7_14_v3	1092936	+	686 (Gene)
PF3D7_1431300	LSG1	Pf3D7_14_v3	1231036	+	150 (Gene)
PF3D7_1434500	PF3D7_1434500	Pf3D7_14_v3	1402665	-	16371 (Gene)
PF3D7_1442900	SEC7	Pf3D7_14_v3	1753510	+	3655 (Gene)
PF3D7_1449500	ApiAP2	Pf3D7_14_v3	2031087	+	835 (Gene)
PF3D7_1449600	N.A.	Pf3D7_14_v3	2036630	-	43 (Gene)
PF3D7_1455400	HlyIII	Pf3D7_14_v3	2263801	-	391 (Gene)
PF3D7_1457400	PF3D7_1457400	Pf3D7_14_v3	2350985	+	7765 (Gene)
PF3D7_1462000	TLP1	Pf3D7_14_v3	2518757	-	158 (Gene)
PF3D7_1464000	PF3D7_1464000	Pf3D7_14_v3	2594119	-	1900 (Gene)
PF3D7_1464100	PF3D7_1464100	Pf3D7_14_v3	2595869	+	1014 (Gene)
PF3D7_1464300	N.A.	Pf3D7_14_v3	2601441	+	100 (Gene)
PF3D7_1469600	ACC	Pf3D7_14_v3	2852150	+	2346 (Gene)
PF3D7_1472200	HDA1	Pf3D7_14_v3	2945662	+	4827 (Gene)
PF3D7_1475100	N.A.	Pf3D7_14_v3	3076442	+	1042 (Gene)
PF3D7_1476300	PF3D7_1476300	Pf3D7_14_v3	3139140	+	1175 (Gene)
PF3D7_1477200	PF3D7_1477200	Pf3D7_14_v3	3175541	+	793 (Gene)
PF3D7_1478300	N.A.	Pf3D7_14_v3	3221001	+	405 (Gene)
PF3D7_1478900	N.A.	Pf3D7_14_v3	3247032	+	1316 (Gene), 1503 (Gene)
PF3D7_1479000	ACS1a	Pf3D7_14_v3	3254092	+	2345 (Gene)
PF3D7_1479500	PF3D7_1479500	Pf3D7_14_v3	3269494	+	255 (Gene)
