# Supplementary material for: PfAP2-EXP2, an Essential Transcription Factor for the Intraerythrocytic Development of Plasmodium falciparum
Source: Front Cell Dev Biol. 2022 Jan 10;9:782293. doi: 10.3389/fcell.2021.782293 (PMC8785209; doi:10.3389/fcell.2021.782293)
Supplement: Supplementary file 3 [file Table3.XLSX]

## Sheet: Table S3
Table S3. Pathways and functional families enriched in the PfAP2-EXP2 heterochromatic targets at the schizont stage (BH adjusted enrichment p-values of < 0.01)
Pathway	BH Adjusted p-Value	Gene Ratio	Target Genes
HP1 enrichment values	1.28873e-108	0.892308	PF3D7_0100600, PF3D7_0114200, PF3D7_0114700, PF3D7_0115000, PF3D7_0115300, PF3D7_0115700, PF3D7_0200100, PF3D7_0200700, PF3D7_0200800, PF3D7_0220900, PF3D7_0222500, PF3D7_0222700, PF3D7_0223300, PF3D7_0223400, PF3D7_0300200, PF3D7_0324400, PF3D7_0324500, PF3D7_0324600, PF3D7_0324900, PF3D7_0400400, PF3D7_0400500, PF3D7_0400900, PF3D7_0401200, PF3D7_0402500, PF3D7_0402600, PF3D7_0402700, PF3D7_040…
Structure of telomere and sub-telomeric regions	6.57027e-99	0.784615	PF3D7_0100600, PF3D7_0114200, PF3D7_0114700, PF3D7_0115300, PF3D7_0115700, PF3D7_0200100, PF3D7_0200700, PF3D7_0222500, PF3D7_0222700, PF3D7_0223400, PF3D7_0300200, PF3D7_0324400, PF3D7_0324500, PF3D7_0324600, PF3D7_0324900, PF3D7_0400400, PF3D7_0400500, PF3D7_0400900, PF3D7_0401200, PF3D7_0402500, PF3D7_0402600, PF3D7_0402700, PF3D7_0412400, PF3D7_0412600, PF3D7_0412900, PF3D7_0413100, PF3D7_042…
Rosette formation between normal and infected RBC	1.29641e-95	0.784615	PF3D7_0100600, PF3D7_0114700, PF3D7_0115300, PF3D7_0115700, PF3D7_0200100, PF3D7_0200700, PF3D7_0200800, PF3D7_0222500, PF3D7_0222700, PF3D7_0223300, PF3D7_0223400, PF3D7_0300200, PF3D7_0324400, PF3D7_0324500, PF3D7_0324600, PF3D7_0324700, PF3D7_0324900, PF3D7_0400400, PF3D7_0400500, PF3D7_0400900, PF3D7_0401200, PF3D7_0402500, PF3D7_0402600, PF3D7_0402700, PF3D7_0412400, PF3D7_0412600, PF3D7_041…
Interactions between modified host cell membrane and endothelial cell	1.20554e-92	0.792308	PF3D7_0100600, PF3D7_0114700, PF3D7_0115000, PF3D7_0115300, PF3D7_0115700, PF3D7_0200100, PF3D7_0200700, PF3D7_0200800, PF3D7_0222500, PF3D7_0222700, PF3D7_0223300, PF3D7_0223400, PF3D7_0300200, PF3D7_0324400, PF3D7_0324500, PF3D7_0324600, PF3D7_0324700, PF3D7_0324900, PF3D7_0400400, PF3D7_0400500, PF3D7_0400900, PF3D7_0401200, PF3D7_0402500, PF3D7_0402600, PF3D7_0402700, PF3D7_0412400, PF3D7_041…
Candidate genes related to virulence	5.80709e-75	0.792308	PF3D7_0100600, PF3D7_0113900, PF3D7_0114700, PF3D7_0115300, PF3D7_0115700, PF3D7_0200100, PF3D7_0200700, PF3D7_0222500, PF3D7_0222700, PF3D7_0223300, PF3D7_0223400, PF3D7_0300200, PF3D7_0324400, PF3D7_0324500, PF3D7_0324600, PF3D7_0324900, PF3D7_0400400, PF3D7_0400500, PF3D7_0400900, PF3D7_0401200, PF3D7_0402600, PF3D7_0412400, PF3D7_0412900, PF3D7_0413100, PF3D7_0420700, PF3D7_0421200, PF3D7_042…
PfEMP1 domain architectures	5.17137e-30	0.230769	PF3D7_0115700, PF3D7_0200100, PF3D7_0324900, PF3D7_0400400, PF3D7_0412400, PF3D7_0412900, PF3D7_0413100, PF3D7_0420700, PF3D7_0426000, PF3D7_0533100, PF3D7_0632500, PF3D7_0632800, PF3D7_0700100, PF3D7_0712600, PF3D7_0712900, PF3D7_0800200, PF3D7_0808700, PF3D7_0833500, PF3D7_0937600, PF3D7_0937800, PF3D7_1041300, PF3D7_1100100, PF3D7_1100200, PF3D7_1150400, PF3D7_1200100, PF3D7_1200400, PF3D7_121…
P. falciparum genes harboring G-quadruplexes	8.50364e-11	0.276923	PF3D7_0115700, PF3D7_0200100, PF3D7_0324900, PF3D7_0400400, PF3D7_0400900, PF3D7_0402800, PF3D7_0412400, PF3D7_0412600, PF3D7_0412900, PF3D7_0413100, PF3D7_0420700, PF3D7_0426000, PF3D7_0500500, PF3D7_0601300, PF3D7_0632500, PF3D7_0632800, PF3D7_0700100, PF3D7_0711900, PF3D7_0712600, PF3D7_0712900, PF3D7_0800200, PF3D7_0808700, PF3D7_0833500, PF3D7_0900300, PF3D7_0937800, PF3D7_1039700, PF3D7_104…
Protein-protein interaction between human erythrocyte and P. falciparum	0.000329033	0.0692308	PF3D7_0413100, PF3D7_0420700, PF3D7_0632800, PF3D7_0712600, PF3D7_0833500, PF3D7_1100100, PF3D7_1100200, PF3D7_1150400, PF3D7_1219300
Arginine-methylated proteins	0.000839803	0.0615385	PF3D7_0632500, PF3D7_0632800, PF3D7_0800400, PF3D7_0808700, PF3D7_0833500, PF3D7_1041100, PF3D7_1300100, PF3D7_1400100
variant genes: rifin family	3.61945e-53	0.433824	PF3D7_0100600, PF3D7_0114700, PF3D7_0115300, PF3D7_0200700, PF3D7_0222500, PF3D7_0222700, PF3D7_0223400, PF3D7_0300200, PF3D7_0324400, PF3D7_0324500, PF3D7_0400500, PF3D7_0400900, PF3D7_0401200, PF3D7_0402500, PF3D7_0402700, PF3D7_0412600, PF3D7_0421200, PF3D7_0500500, PF3D7_0600300, PF3D7_0631800, PF3D7_0632100, PF3D7_0632200, PF3D7_0632300, PF3D7_0632400, PF3D7_0632700, PF3D7_0700300, PF3D7_070…
variant genes: var family	1.42106e-35	0.279412	PF3D7_0101500, PF3D7_0115700, PF3D7_0200100, PF3D7_0200800, PF3D7_0223300, PF3D7_0324700, PF3D7_0324900, PF3D7_0400400, PF3D7_0402800, PF3D7_0412400, PF3D7_0412900, PF3D7_0413100, PF3D7_0420700, PF3D7_0426000, PF3D7_0533100, PF3D7_0601400, PF3D7_0632500, PF3D7_0632800, PF3D7_0700100, PF3D7_0712600, PF3D7_0712900, PF3D7_0800200, PF3D7_0808700, PF3D7_0833500, PF3D7_0937600, PF3D7_0937800, PF3D7_103…
variant genes: stevor family	1.29226e-07	0.0735294	PF3D7_0324600, PF3D7_0402600, PF3D7_0631900, PF3D7_0700700, PF3D7_0832000, PF3D7_0900900, PF3D7_1040200, PF3D7_1254600, PF3D7_1300900, PF3D7_1479500
var-associated ncRNAs	4.83703e-05	0.0367647	PF3D7_0412500, PF3D7_0413000, PF3D7_0420800, PF3D7_0421000, PF3D7_1240500
exported proteins	0.000266406	0.0661765	PF3D7_0220900, PF3D7_0832700, PF3D7_0901200, PF3D7_1253800, PF3D7_1253900, PF3D7_1301100, PF3D7_1373200, PF3D7_1477200, PF3D7_1478300
variant genes: mc-2tm family	0.000334071	0.0294118	PF3D7_0713100, PF3D7_1039700, PF3D7_1100800, PF3D7_1101700
epf family	0.00211735	0.0220588	PF3D7_0114200, PF3D7_0222300, PF3D7_0601300
