# Supplementary material for: PfAP2-EXP2, an Essential Transcription Factor for the Intraerythrocytic Development of Plasmodium falciparum
Source: Front Cell Dev Biol. 2022 Jan 10;9:782293. doi: 10.3389/fcell.2021.782293 (PMC8785209; doi:10.3389/fcell.2021.782293)
Supplement: Supplementary file 4 [file Table6.XLSX]

## Sheet: Table S6
Table S6. Significantly changed genes by the PfAP2-EXP2 knockdown at the schizont stage (fold change of > 2 and false discovery rate of < 0.05)
Gene ID	Gene Name	log2 Fold Change	False Discovery Rate
PF3D7_1201200	PF3D7_1201200	-2.93352	0.00016172
PF3D7_0424200	RH4	-2.23667	0.000172726
PF3D7_0221700	PF3D7_0221700	-2.17598	0.000172726
PF3D7_1316200	PF3D7_1316200	-1.59761	0.000172726
PF3D7_0318700	N.A.	-2.22387	0.000367677
PF3D7_0219900	PF3D7_0219900	-1.60072	0.000367677
PF3D7_0102700	MaTrA	-2.33618	0.000367677
PF3D7_1460600	ISP3	-1.36676	0.000367677
PF3D7_0919200	N.A.	-1.68245	0.000401835
PF3D7_1352900	PF3D7_1352900	-3.31942	0.000401835
PF3D7_0613600	N.A.	-1.1963	0.000401835
PF3D7_0108900	N.A.	-1.97426	0.000401835
PF3D7_1204900	PF3D7_1204900	-1.92887	0.000401835
PF3D7_0935700	PF3D7_0935700	-2.061	0.000401835
PF3D7_1327600	NMNAT	-1.59583	0.000401835
PF3D7_1243400	PF3D7_1243400	-1.56353	0.000401835
PF3D7_0316000	MA	-1.85648	0.000401835
PF3D7_0423900	PF3D7_0423900	-2.35733	0.000401835
PF3D7_1014100	MSA180	-1.59809	0.000401835
PF3D7_0920700	N.A.	-1.04009	0.000401835
PF3D7_0902500	FIKK9.6	-2.72263	0.00041788
PF3D7_1331500	PF3D7_1331500	-1.37537	0.000447978
PF3D7_1478800	PF3D7_1478800	-1.47783	0.000450015
PF3D7_0930200	LRR8	-1.79288	0.000450015
PF3D7_0630100	PF3D7_0630100	-1.52232	0.000490813
PF3D7_0308700	N.A.	-1.05829	0.000490813
PF3D7_1318700	PF3D7_1318700	-1.32855	0.000568413
PF3D7_0308300	PF3D7_0308300	-1.6227	0.000583675
PF3D7_0220500	PF3D7_0220500	-1.74726	0.000583675
PF3D7_0524800	UFD1	-1.26551	0.000583675
PF3D7_1411000	N.A.	-1.93475	0.000925984
PF3D7_0618000	PF3D7_0618000	-1.13764	0.00100004
PF3D7_1013800	PF3D7_1013800	-1.00794	0.00100004
PF3D7_0625400	PF3D7_0625400	-1.8097	0.00100004
PF3D7_1017500	ELC	-2.04589	0.00100004
PF3D7_0402100	PF3D7_0402100	-2.4383	0.00100004
PF3D7_0219700	GEXP20	-2.25353	0.00100004
PF3D7_0830900	PF3D7_0830900	-1.04266	0.0010263
PF3D7_0530100	SYN6	-1.204	0.00116222
PF3D7_1345100	TRX2	-1.33478	0.0011892
PF3D7_0304100	IMC1e	-1.35564	0.0012222
PF3D7_1434400	PF3D7_1434400	-1.16358	0.00128796
PF3D7_1016000	PF3D7_1016000	-1.51281	0.00128796
PF3D7_0323400	RIPR	-1.82993	0.00128796
PF3D7_1404700	N.A.	-2.29885	0.00128796
PF3D7_1114200	N.A.	-1.45221	0.00128796
PF3D7_0210700	SYN17	-1.36652	0.00128796
PF3D7_0525300	N.A.	-1.48688	0.00137985
PF3D7_1231300	PF3D7_1231300	-1.75458	0.00138046
PF3D7_1420300	HEP1	-1.38764	0.00138046
PF3D7_0805300	PF3D7_0805300	-1.9788	0.00138046
PF3D7_1335200	N.A.	-2.42981	0.00138645
PF3D7_1366100	DIP13	-1.54806	0.00138882
PF3D7_0814500	N.A.	-1.92441	0.00143752
PF3D7_1023000	PF3D7_1023000	-1.22483	0.00148997
PF3D7_1342500	SPECT1	-1.88265	0.00175357
PF3D7_1240100	ETRAMP12	-2.36364	0.00195156
PF3D7_0731000	N.A.	-2.57715	0.00195156
PF3D7_1002000	PF3D7_1002000	-3.66202	0.0020586
PF3D7_1037500	DYN2	-1.01686	0.00206942
PF3D7_0423800	CyRPA	-1.3121	0.00220977
PF3D7_0424500	FIKK4.1	-2.45226	0.002223
PF3D7_1003600	IMC1c	-1.65521	0.00233223
PF3D7_1016800	PF3D7_1016800	-2.2649	0.00234185
PF3D7_0800900	N.A.	-4.79037	0.00234185
PF3D7_1401900	N.A.	-1.77611	0.00234185
PF3D7_0731200	PF3D7_0731200	-1.39624	0.00239657
PF3D7_0414800	N.A.	-2.03696	0.00239657
PF3D7_1468400	D13	-1.52917	0.00247945
PF3D7_0902100	FIKK9.2	-1.3094	0.00284897
PF3D7_0910600	YKT6.1	-1.05324	0.00286235
PF3D7_0415800	PF3D7_0415800	-1.50043	0.00296171
PF3D7_1244100	PF3D7_1244100	-1.04188	0.00296171
PF3D7_0800800	PF3D7_0800800	-2.36497	0.00306942
PF3D7_1019900	ATG8	-1.18893	0.00328532
PF3D7_0931900	AKLP2	-1.5862	0.00328532
PF3D7_1037400	N.A.	-1.01246	0.0036116
PF3D7_0301800	PF3D7_0301800	-2.93894	0.0036116
PF3D7_1304200	MIT2	-1.23524	0.00383901
PF3D7_0424600	PF3D7_0424600	-2.54147	0.00384906
PF3D7_0726100	PF3D7_0726100	-1.71449	0.00386778
PF3D7_1149300	FIKK11	-1.69114	0.00386778
PF3D7_0207200	IscA1	-1.18365	0.00386778
PF3D7_1473400	PF3D7_1473400	-1.49594	0.00407872
PF3D7_0210600	N.A.	-1.59629	0.00413978
PF3D7_1224200	PF3D7_1224200	-1.24247	0.00413978
PF3D7_0424100	RH5	-1.81483	0.00413978
PF3D7_0316100	PF3D7_0316100	-1.00515	0.00413978
PF3D7_0202100	LSAP2	-2.16526	0.0041459
PF3D7_1351700	IMC1f	-1.45841	0.00431583
PF3D7_1231400	PF3D7_1231400	-1.42947	0.00440632
PF3D7_1401100	PF3D7_1401100	-2.86974	0.00440632
PF3D7_0929600	PF3D7_0929600	-1.1193	0.00450903
PF3D7_0215300	ACS8	-2.27913	0.00452281
PF3D7_1469200	SHLP1	-1.21778	0.00452281
PF3D7_1329700	ACBP1	-1.58988	0.00452281
PF3D7_0822900	PF3D7_0822900	-1.56221	0.00452281
PF3D7_1331000	PF3D7_1331000	-1.10341	0.00471748
PF3D7_1231200	PF3D7_1231200	-1.67957	0.00478439
PF3D7_1341500	ISC1	-1.00725	0.00478439
PF3D7_0202200	PTP1	-2.98235	0.00523231
PF3D7_1310200	PF3D7_1310200	-1.00801	0.00557162
PF3D7_1126700	N.A.	-1.40045	0.00586525
PF3D7_1337800	CDPK5	-2.05923	0.00605503
PF3D7_0214700	PF3D7_0214700	-1.53012	0.00636058
PF3D7_1404800	PF3D7_1404800	-2.20553	0.0069363
PF3D7_1312500	N.A.	-1.38616	0.00714575
PF3D7_1446300	PF3D7_1446300	-1.3625	0.00716963
PF3D7_0515400	N.A.	-1.23723	0.00730969
PF3D7_0507400	PF3D7_0507400	-1.98961	0.00752667
PF3D7_1417400	N.A.	-1.06136	0.00826546
PF3D7_0209500	PF3D7_0209500	-1.07476	0.00868067
PF3D7_1230100	TLAP1	-1.03389	0.00868067
PF3D7_0407900	PF3D7_0407900	-1.49712	0.00868067
PF3D7_0404000	N.A.	-1.44351	0.00868067
PF3D7_1321900	N.A.	-1.41319	0.00889804
PF3D7_0404800	PF3D7_0404800	-1.08269	0.00909186
PF3D7_0502400	MSP8	-2.10596	0.00932257
PF3D7_0830600	PF3D7_0830600	-2.2915	0.00932257
PF3D7_0516500	MFS1	-1.43417	0.00932528
PF3D7_1351800	PF3D7_1351800	-1.07794	0.00932528
PF3D7_1102700	ETRAMP11.1	-2.69619	0.00946592
PF3D7_1149500	N.A.	-2.19533	0.00949032
PF3D7_0831500	PF3D7_0831500	-1.29421	0.00952632
PF3D7_0201700	PF3D7_0201700	-2.81631	0.00958524
PF3D7_0702300	STARP	-2.87971	0.00999394
PF3D7_1310300	PF3D7_1310300	-1.60296	0.0101523
PF3D7_1200700	ACS7	-3.32746	0.0107179
PF3D7_0504100	PF3D7_0504100	-1.15212	0.0108835
PF3D7_0730400	N.A.	-1.57339	0.0112051
PF3D7_0922300	N.A.	-1.18834	0.0112051
PF3D7_0818600	PBLP	-1.06262	0.0112051
PF3D7_1127600	PF3D7_1127600	-1.15778	0.0112051
PF3D7_0307300	EB1	-1.08943	0.0112377
PF3D7_0935600	N.A.	-2.92948	0.0113168
PF3D7_1119700	PF3D7_1119700	-1.16563	0.0114505
PF3D7_0920500	PF3D7_0920500	-1.1687	0.0115034
PF3D7_0911100	PF3D7_0911100	-1.7644	0.0117602
PF3D7_0914100	PF3D7_0914100	-1.25782	0.0119958
PF3D7_0908500	N.A.	-1.0161	0.012018
PF3D7_0620300	PF3D7_0620300	-1.09656	0.0120966
PF3D7_0220400	N.A.	-1.74539	0.0121562
PF3D7_0220700	PF3D7_0220700	-1.54651	0.0123692
PF3D7_0731800	N.A.	-1.5548	0.0123692
PF3D7_0707500	N.A.	-1.8918	0.0123766
PF3D7_1102900	PF3D7_1102900	-1.93405	0.0129564
PF3D7_1016700	N.A.	-1.84543	0.0130525
PF3D7_0818100	PF3D7_0818100	-1.78764	0.0130762
PF3D7_1125800	N.A.	-1.95995	0.0135815
PF3D7_1355200	N.A.	-1.17136	0.0136421
PF3D7_1460100	FCP	-1.50269	0.0136421
PF3D7_0101100	EPF4	-1.18314	0.0137616
PF3D7_0828800	GAMA	-1.74811	0.0138795
PF3D7_0813800	GMD	-1.12892	0.0139752
PF3D7_0907500	N.A.	-1.15036	0.0148051
PF3D7_0702200	PF3D7_0702200	-1.94171	0.0148476
PF3D7_1344100	PF3D7_1344100	-1.28598	0.0148476
PF3D7_0628400	PF3D7_0628400	-2.05426	0.0154649
PF3D7_1405700	PF3D7_1405700	-1.03502	0.0155566
PF3D7_1423300	PP7	-1.22637	0.0156419
PF3D7_0729700	N.A.	-1.01149	0.0158175
PF3D7_0402300	RH1	-1.9206	0.0160435
PF3D7_0408000	N.A.	-1.90399	0.0161246
PF3D7_1001100	ACBP1	-2.72227	0.0161246
PF3D7_1321400	DHHC8	-1.03266	0.0166316
PF3D7_1105600	PTEX88	-1.51853	0.0174589
PF3D7_1115800	PF3D7_1115800	-1.98823	0.0175482
PF3D7_0112900	PF3D7_0112900	-1.885	0.0179773
PF3D7_1461400	N.A.	-1.3114	0.0181492
PF3D7_1221900	PF3D7_1221900	-1.33017	0.0181688
PF3D7_0605600	PF3D7_0605600	-1.54488	0.0188489
PF3D7_0210800	PF3D7_0210800	-1.06982	0.0190131
PF3D7_1149600	PF3D7_1149600	-2.3607	0.0198361
PF3D7_1138700	N.A.	-1.21753	0.0200848
PF3D7_1104900	PF3D7_1104900	-1.3481	0.0202776
PF3D7_1475800	PF3D7_1475800	-1.16746	0.0207928
PF3D7_1413800	DPH1	-1.4228	0.0211724
PF3D7_0934600	PF3D7_0934600	-1.80175	0.0223606
PF3D7_1127900	PF3D7_1127900	-1.3928	0.022631
PF3D7_0314100	PF3D7_0314100	-1.57068	0.0228767
PF3D7_0919300	TrxL1	-1.96241	0.0235032
PF3D7_1413700	N.A.	-1.54991	0.0236701
PF3D7_0421700	N.A.	-1.96444	0.0236798
PF3D7_0507300	SOPT	-2.08978	0.0244197
PF3D7_0805200	GAMER	-2.15644	0.0255103
PF3D7_1002100	PTP5	-2.08018	0.0257534
PF3D7_0528300	PF3D7_0528300	-1.3354	0.0257534
PF3D7_0936000	REX2	-2.22667	0.0263406
PF3D7_1365600	TOP6B	-1.40318	0.0263613
PF3D7_0932000	PF3D7_0932000	-1.51413	0.0268945
PF3D7_0903600	PF3D7_0903600	-1.5365	0.0288008
PF3D7_1028900	IMC1m	-1.32267	0.0292118
PF3D7_0507500	SUB1	-1.8652	0.0303943
PF3D7_0425200	PF3D7_0425200	-2.77429	0.0305004
PF3D7_0706300	N.A.	-1.49055	0.0313277
PF3D7_1361400	ADF2	-1.01238	0.0313277
PF3D7_1125700	N.A.	-1.70912	0.0313656
PF3D7_0918700	PF3D7_0918700	-2.04381	0.0352414
PF3D7_0403800	PF3D7_0403800	-1.31209	0.036268
PF3D7_0725400	N.A.	-1.85652	0.0366343
PF3D7_1146200	N.A.	-1.50984	0.0366498
PF3D7_1416500	GDH1	-1.64363	0.0366952
PF3D7_0814700	N.A.	-1.42259	0.0382538
PF3D7_1149200	N.A.	-2.64284	0.0384145
PF3D7_0109100	CCp5	-1.52625	0.0384145
PF3D7_0108500	PF3D7_0108500	-2.84419	0.0386451
PF3D7_0730800	PF3D7_0730800	-2.55865	0.0386451
PF3D7_1247800	DPAP2	-1.01896	0.0395012
PF3D7_1361500	PF3D7_1361500	-1.13454	0.0401509
PF3D7_1246400	MTIP	-1.50063	0.0401509
PF3D7_0102200	RESA	-3.17386	0.0401509
PF3D7_0213800	PF3D7_0213800	1.0253	0.0402003
PF3D7_0628300	CEPT	-1.34354	0.0402003
PF3D7_0418600	PF3D7_0418600	-1.61454	0.0405687
PF3D7_1218500	DYN3	-1.34768	0.0405687
PF3D7_0906500	PF3D7_0906500	-1.16941	0.0412033
PF3D7_0731100	PTP2	-1.06754	0.0412033
PF3D7_0525800	IMC1g	-1.64928	0.0415904
PF3D7_1425400	PF3D7_1425400	-1.09301	0.0431816
PF3D7_1372300	PF3D7_1372300	-1.54826	0.0449265
PF3D7_0501100	HSP40	-1.39932	0.0454092
PF3D7_0803500	PF3D7_0803500	-1.52891	0.0462451
PF3D7_0503600	MyoB	-1.68401	0.0470707
PF3D7_1218000	TRAMP	-1.61234	0.0482612
PF3D7_0402900	N.A.	-2.79211	0.0486505
PF3D7_1035900	M566	-1.30971	0.0487057
PF3D7_1353200	MAHRP2	-1.67519	0.049102
PF3D7_1451600	LAP5	-1.41915	0.049106
PF3D7_0718300	CRMP2	-2.31432	0.0491333
