# Supplementary material for: PfAP2-EXP2, an Essential Transcription Factor for the Intraerythrocytic Development of Plasmodium falciparum
Source: Front Cell Dev Biol. 2022 Jan 10;9:782293. doi: 10.3389/fcell.2021.782293 (PMC8785209; doi:10.3389/fcell.2021.782293)
Supplement: Supplementary file 5 [file Table4.XLSX]

## Sheet: Table S4
Table S4. Significantly changed genes by the PfAP2-EXP2 knockdown at the ring stage (fold change of > 2 and false discovery rate of < 0.05)
Gene ID	Gene Name	log2 Fold Change	False Discovery Rate
PF3D7_1451000	PF3D7_1451000	1.89276	0.0165409
