# Supplementary material for: PfAP2-EXP2, an Essential Transcription Factor for the Intraerythrocytic Development of Plasmodium falciparum
Source: Front Cell Dev Biol. 2022 Jan 10;9:782293. doi: 10.3389/fcell.2021.782293 (PMC8785209; doi:10.3389/fcell.2021.782293)
Supplement: Supplementary file 6 [file Table1.XLSX]

## Sheet: Sheet1
Table S1. Primers used for plasmid construction and PCR verification
Usage	Accession	Sequence
pfap2-exp2-ty1-glms construction	P1	GTTGTAATGTTAAAGGGGTAAG
	P2	CCGGTACCTTTTTCATTAATATAATTTTCTTCTTCC
	P3	TAATGAAAAAGGTACCGGAAGTGGTTCTG
	P4	TTTTAGGTTTGCGGCCGCGTCCCCTC
	P5	CGCGGCCGCAAACCTAAAAGTCTTAAATTTTAAATATAC
	P6	CGCATATATAATACATCTTTATATACG
pfap2-exp2-ty1-glms PCR verification	F1	GGACGATGAAAAACAAGTTGAATTATAC
	R1	TATAAACATATTGACGTTAAAAATTAATATGTAGG
	R2	CCTCGTCAACTAAGCC
pfap2-exp2-ty1-gfp construction	P1	GTTGTAATGTTAAAGGGGTAAG
	P2	TTTTTCATTAATATAATTTTCTTCTTCCATTTG
	P3	AGAAAATTATATTAATGAAAAACTCGAGGAAGTACATACTAACC
	P4	ATTTAAAATTTAAGACTTTTAGGTTTGCGGCCGCTTATTTGTATA
	P5	AAACCTAAAAGTCTTAAATTTTAAATATACC
	P6	CGCATATATAATACATCTTTATATACG
pfap2-exp2-ty1-gfp PCR verification	F1	GGACGATGAAAAACAAGTTGAATTATAC
	R1	TATAAACATATTGACGTTAAAAATTAATATGTAGG
	R2	GAAAAAGTCATGCTGTTTCATATG
