# Supplementary material for: PfAP2-EXP2, an Essential Transcription Factor for the Intraerythrocytic Development of Plasmodium falciparum
Source: Front Cell Dev Biol. 2022 Jan 10;9:782293. doi: 10.3389/fcell.2021.782293 (PMC8785209; doi:10.3389/fcell.2021.782293)
Supplement: Supplementary file 9 [file Table7.XLSX]

## Sheet: Table S7
Table S7. MPMP pathways enriched in significantly decreased genes in the PfAP2-EXP2 knockdown schizonts (BH adjusted enrichment p-values of < 0.01)
Pathway	BH Adjusted p-Value	Gene Ratio	Downregulated Genes
Co-inhibition of S-adenosylmethionine decarboxylase/ornithine decarboxylase effect on gene expression	1.66053e-05	0.21547	PF3D7_1201200, PF3D7_1352900, PF3D7_0902500, PF3D7_0219700, PF3D7_0830900, PF3D7_1240100, PF3D7_1002000, PF3D7_0424500, PF3D7_1003600, PF3D7_1016800, PF3D7_0731200, PF3D7_0301800, PF3D7_0424600, PF3D7_0726100, PF3D7_0202100, PF3D7_1401100, PF3D7_0215300, PF3D7_1341500, PF3D7_0202200, PF3D7_0830600, PF3D7_1102700, PF3D7_0201700, PF3D7_0702300, PF3D7_1200700, PF3D7_0935600, PF3D7_1102900, PF3D7_112…
Transcriptomic response of dihydroartemisinin (DHA) treated K1 strain trophozoites	5.96625e-05	0.0828729	PF3D7_0919200, PF3D7_0220500, PF3D7_0424500, PF3D7_0731200, PF3D7_0931900, PF3D7_0301800, PF3D7_1149300, PF3D7_0215300, PF3D7_0202200, PF3D7_0502400, PF3D7_1200700, PF3D7_1016700, PF3D7_0702200, PF3D7_0918700, PF3D7_0730800
Subcellular location of exported proteins	6.71982e-05	0.0607735	PF3D7_0219700, PF3D7_1345100, PF3D7_1016800, PF3D7_0202100, PF3D7_0202200, PF3D7_1016700, PF3D7_1105600, PF3D7_0936000, PF3D7_0102200, PF3D7_0501100, PF3D7_1353200
Components of the linear motor responsible for merozoite motility in invasion	0.000159834	0.0607735	PF3D7_1460600, PF3D7_1017500, PF3D7_0304100, PF3D7_1003600, PF3D7_1351700, PF3D7_0929600, PF3D7_1341500, PF3D7_1028900, PF3D7_1361400, PF3D7_1246400, PF3D7_0525800
Exported proteins of P. falciparum with confirmed location	0.0001654	0.0662983	PF3D7_0902500, PF3D7_0424500, PF3D7_0202200, PF3D7_1404800, PF3D7_0830600, PF3D7_0702300, PF3D7_0101100, PF3D7_0936000, PF3D7_0102200, PF3D7_0731100, PF3D7_0501100, PF3D7_1353200
Putatively exported proteins in early gametocyte proteome	0.000235795	0.0662983	PF3D7_0402100, PF3D7_0219700, PF3D7_0424600, PF3D7_0202200, PF3D7_0830600, PF3D7_0201700, PF3D7_0731800, PF3D7_1002100, PF3D7_1149200, PF3D7_0102200, PF3D7_0731100, PF3D7_0501100
Gametocyte IMC and plate formation	0.000390915	0.0441989	PF3D7_1460600, PF3D7_0304100, PF3D7_1003600, PF3D7_1351700, PF3D7_1341500, PF3D7_1028900, PF3D7_1246400, PF3D7_0525800
Exported proteins containing a PHIST domain	0.000390915	0.0718232	PF3D7_0402100, PF3D7_0219700, PF3D7_1016800, PF3D7_0424600, PF3D7_0202100, PF3D7_0830600, PF3D7_1149500, PF3D7_0201700, PF3D7_1016700, PF3D7_1001100, PF3D7_1149200, PF3D7_0102200, PF3D7_0731100
Functional annotation of merozoite invasion-related proteins	0.00600643	0.0662983	PF3D7_0424200, PF3D7_0316000, PF3D7_1014100, PF3D7_0323400, PF3D7_0423800, PF3D7_0210600, PF3D7_0424100, PF3D7_0502400, PF3D7_0828800, PF3D7_0402300, PF3D7_0730800, PF3D7_1218000
Characteristics of P. falciparum export proteins that remodel infected erythrocyte	0.00600643	0.0441989	PF3D7_0402100, PF3D7_0424600, PF3D7_0220400, PF3D7_1002100, PF3D7_0936000, PF3D7_0102200, PF3D7_1353200, PF3D7_0718300
Translocon of exported proteins (PTEX)	0.00950786	0.0331492	PF3D7_1345100, PF3D7_0202200, PF3D7_1105600, PF3D7_1002100, PF3D7_0102200, PF3D7_1353200
